# Supplementary material for: Hepatic Fibrosis and Steatosis in Metabolic Syndrome
Source: PubMed Central journal article supplement — J Obes Metab Syndr. 2022 Mar 14;31(1):61–9. doi: 10.7570/jomes21062 (PMC8987451; doi:10.7570/jomes21062), 2022-03-14
Supplement: jomes-31-1-61-supple.pdf [file jomes-31-1-61-supple.pdf]

**Supplementary Table 1.** Logistic regression models for steatosis and fibrosis by metabolic syndrome components and adjusted for demographic covariates

| Variable                       | Steatosis          | Any fibrosis      | Severe steatosis    | Severe fibrosis    | Fibrosis without steatosis |
|--------------------------------|--------------------|-------------------|---------------------|--------------------|----------------------------|
| Low HDL cholesterol level      |                    |                   |                     |                    |                            |
| Yes                            | 1.81 (1.40–2.35)*  | 1.49 (1.10–2.03)* | 1.90 (1.31–2.77)*   | 2.13 (1.03–4.43)*  | 1.19 (0.57–2.47)           |
| No                             | -                  | -                 | -                   | -                  | -                          |
| High blood pressure            |                    |                   |                     |                    |                            |
| Yes                            | 2.03 (1.53–2.69)*  | 2.01 (1.34–3.02)* | 2.42 (1.62–3.61)*   | 1.85 (1.13–3.02)*  | 2.94 (1.58–5.45)*          |
| No                             | -                  | -                 | -                   | -                  | -                          |
| Waist circumference above goal |                    |                   |                     |                    |                            |
| Yes                            | 8.63 (6.40–11.63)* | 3.50 (2.12–5.79)* | 13.90 (9.52–20.32)* | 5.06 (2.19–11.73)* | 1.68 (0.86–3.27)           |
| No                             | -                  | -                 | -                   | -                  | -                          |
| High blood sugar               |                    |                   |                     |                    |                            |
| Yes                            | 1.63 (1.27–2.10)*  | 1.57 (1.16–2.13)* | 2.09 (1.44–3.03)*   | 2.10 (1.17–3.77)*  | 0.98 (0.53–1.83)           |
| No                             | -                  | -                 | -                   | -                  | -                          |
| High triglyceride              |                    |                   |                     |                    |                            |
| Yes                            | 1.19 (0.91–1.57)   | 1.02 (0.72–1.45)  | 1.04 (0.75–1.44)    | 0.66 (0.36–1.23)   | 1.36 (0.66–2.81)           |
| No                             | -                  | -                 | -                   | -                  | -                          |
| Age                            |                    |                   |                     |                    |                            |
|                                | 1.00 (0.99–1.01)   | 1.00 (0.99–1.01)  | 0.99 (0.98–1.00)    | 1.01 (0.99–1.03)   | 1.00 (0.98–1.03)           |
| Sex                            |                    |                   |                     |                    |                            |
| Male                           | 2.74 (2.06–3.63)*  | 1.89 (1.29–2.79)  | 3.23 (2.26–4.62)*   | 1.73 (0.86–3.47)   | 1.33 (0.89–1.99)           |
| Female                         | -                  | -                 | -                   | -                  | -                          |
| Race                           |                    |                   |                     |                    |                            |
| Non-Hispanic White             | -                  | -                 | -                   | -                  | -                          |
| Non-Hispanic Black             | 0.59 (0.46–0.76)*  | 0.86 (0.56–1.33)  | 0.55 (0.39–0.76)    | 0.37 (0.14–0.98)*  | 1.17 (0.69–2.01)           |
| Hispanic                       | 1.55 (1.13–2.13)*  | 1.37 (0.85–2.20)  | 1.28 (0.89–1.85)    | 1.21 (0.60–2.44)   | 1.33 (0.73–2.41)           |
| Other                          | 1.15 (0.67–1.95)   | 0.90 (0.52–1.57)  | 1.19 (0.58–2.42)    | 1.26 (0.55–2.90)   | 0.84 (0.33–2.14)           |
| Education                      |                    |                   |                     |                    |                            |
| Less than high school          | -                  | -                 | -                   | -                  | -                          |
| High school/GED                | 1.51 (1.13–2.02)*  | 1.39 (0.92–2.11)  | 1.73 (1.29–2.33)*   | 1.56 (0.67–3.61)   | 0.65 (0.32–1.33)           |
| Some college or AA             | 1.42 (1.09–1.85)*  | 1.14 (0.75–1.74)  | 1.51 (1.05–2.18)*   | 1.03 (0.54–1.96)   | 0.72 (0.37–1.41)           |
| College graduate or above      | 1.18 (0.83–1.67)   | 0.75 (0.47–1.20)  | 1.20 (0.72–2.00)    | 0.47 (0.16–1.37)   | 0.58 (0.25–1.37)           |
| Health insurance               |                    |                   |                     |                    |                            |
| Yes                            | 1.11 (0.84–1.47)   | 1.08 (0.56–2.08)  | 1.05 (0.73–1.49)    | 1.16 (0.43–3.15)   | 1.45 (0.58–3.63)           |
| No                             | -                  | -                 | -                   | -                  | -                          |
| Depression                     |                    |                   |                     |                    |                            |
| Yes                            | 0.96 (0.62–1.49)   | 0.81 (0.52–1.25)  | 0.92 (0.55–1.54)    | 0.83 (0.44–1.57)   | 0.71 (0.31–1.62)           |
| No                             | -                  | -                 | -                   | -                  | -                          |
| Alcohol use                    |                    |                   |                     |                    |                            |
| Yes                            | 0.88 (0.67–1.14)   | 0.93 (0.69–1.26)  | 0.91 (0.66–1.26)    | 0.76 (0.36–1.59)   | 1.10 (0.65–1.85)           |
| No                             | -                  | -                 | -                   | -                  | -                          |
| Physical activity              |                    |                   |                     |                    |                            |
| ≥ 150 minutes per week         | 0.73 (0.59–0.90)*  | 0.61 (0.37–1.02)  | 0.60 (0.43–0.83)*   | 0.91 (0.38–2.20)   | 0.57 (0.28–1.14)           |
| < 150 minutes per week         | -                  | -                 | -                   | -                  | -                          |

Values are presented as odds ratio (95% confidence interval).

\*Indicates statistical significance with *P*-value less than 0.05.

HDL, high-density lipoprotein; GED, general educational development; AA, associate of arts.

**Supplementary Table 2.** Survey-weighted prevalence of demographic characteristics by fibrosis status for sample without steatosis

| Variable                    | Fibrosis Status  |                  | <i>P</i> |
|-----------------------------|------------------|------------------|----------|
|                             | Yes              | No               |          |
| Sample size                 |                  |                  |          |
| Unweighted                  | 159              | 3,238            | -        |
| Weighted                    | 5,115,789        | 151,371,261      | -        |
| Age (yr), mean (95% CI)     | 52.9 (47.9–57.9) | 45.1 (43.7–46.5) | 0.005*   |
| Sex                         |                  |                  | 0.634    |
| Male                        | 47.7 (37.2–58.2) | 45.3 (42.9–47.6) |          |
| Female                      | 52.3 (41.8–62.8) | 54.7 (52.4–57.1) |          |
| Race                        |                  |                  | 0.375    |
| Hispanic                    | 18.5 (10.3–26.7) | 15.2 (11.3–19.2) |          |
| Non-Hispanic White          | 57.3 (42.2–72.4) | 61.9 (56.4–67.3) |          |
| Non-Hispanic Black          | 16.0 (8.0–23.9)  | 12.1 (8.7–15.5)  |          |
| Other race                  | 8.2 (1.9–14.5)   | 10.8 (7.9–13.7)  |          |
| Education                   |                  |                  | 0.082    |
| Less than high school       | 18.4 (9.2–27.7)  | 11.0 (9.2–12.9)  |          |
| High school/GED             | 27.0 (16.9–37.0) | 26.9 (22.3–29.6) |          |
| Some college or AA degree   | 30.7 (20.2–41.2) | 29.8 (26.4–33.2) |          |
| College graduate and beyond | 23.9 (11.0–36.8) | 33.3 (27.4–39.1) |          |
| Health insurance            |                  |                  | 0.197    |
| Yes                         | 90.0 (83.6–96.4) | 85.6 (81.4–89.9) |          |
| No                          | 10.0 (3.6–16.4)  | 14.4 (10.1–18.6) |          |
| Alcohol use                 |                  |                  | 0.298    |
| Yes                         | 69.6 (59.7–79.4) | 73.7 (71.5–76.0) |          |
| No                          | 30.4 (20.6–40.3) | 26.3 (24.0–28.5) |          |
| Depression                  |                  |                  | 0.517    |
| Yes                         | 6.3 (1.8–10.7)   | 7.9 (6.7–9.2)    |          |
| No                          | 93.7 (89.3–98.2) | 92.1 (90.8–93.3) |          |
| Physical activity           |                  |                  | 0.002*   |
| ≥ 150 minutes per week      | 24.6 (13.2–36.0) | 41.3 (37.6–45.0) |          |
| < 150 minutes per week      | 75.4 (64.0–86.8) | 58.7 (55.0–62.4) |          |

Values are presented as percent (95% CI) unless otherwise indicated.

\*Indicates statistical significance with *P*-value less than 0.05.

CI, confidence interval; GED, general educational development; AA, associate of arts.
